# Supplementary material
Source: PubMed Central journal article supplement (PMC122226)
Supplement: pnas_022618299_2.pdf [file pnas_022618299_2.pdf]

Supporting information for Murray (January 29, 2002) *Proc. Natl. Acad. Sci. USA*, 10.1073/pnas.022618299.

**Table 3. Summary of parameters and parameter values used in tuberculosis transmission model**

| <b>Variable definition</b>                                                               | <b>Age, years</b> | <b>Value(s)</b> | <b>Ref. no.</b> |
|------------------------------------------------------------------------------------------|-------------------|-----------------|-----------------|
| Annual age-specific risk of developing primary disease within 1 year of infection        | 0–10              | 0.025           | 1–5             |
|                                                                                          | 11–20             | 0.056           |                 |
|                                                                                          | >20               | 0.086           |                 |
| Annual risk of developing primary disease within 1 year of infection in the HIV-infected |                   | 0.25            | 6–9             |
| Age-specific protective effect of previous infection in preventing reinfection           | 0–10              | 0.16            | 2, 3            |
|                                                                                          | 11–20             | 0.24            |                 |
|                                                                                          | >20               | 0.41            |                 |
| Annual age-specific risk of reactivation disease                                         | 0–10              | 9.80E-08        | 1–5, 10         |
|                                                                                          | 11–20             | 0.015           |                 |
|                                                                                          | >20               | 0.03            |                 |
| Annual risk of reactivation disease in the HIV-infected                                  |                   | 0.12            | 6–9, 11         |
| Age-specific proportion of active cases that are pulmonary                               | 0–10              | 0.6             | 10              |
|                                                                                          | 11–20             | 0.5             |                 |
|                                                                                          | >20               | 0.35            |                 |

1. Dye, C., Scheele, S., Dolin, P., Pathania, V. & Raviglione, M. C. (1999) *J. Am. Med. Assoc.* **282**, 677-678
2. Vynnycky, E. & Fine, P. E. (1997) *Epidemiol Infect.* **119**, 183-201.
3. Vynnycky, E. & Fine, P. E. (1999) *Int. J. Epidemiol.* **2**, 327-334.
4. Sutherland, I. (1968) *TSRU Progress Report* [Royal Netherlands Tuberculosis Association (KNCV), The Hague, The Netherlands].
5. Sutherland, I., Svandova, E. & Radhakrishna, S. (1982) *Tubercle* **63**, 255-268.
6. Daley, C., Small, P., Schecter, G., *et al.* (1992) *N. Engl. J. Med.* **326**, 231-325

7. Coronado, V., Beck-Segue, C., Hutton, M., *et al.* (1993) *J. Infect. Dis.* **68**, 1052-1055.
8. Ryder, R. W., Batter, V., Kaseka, N., Behets, F., Sequeira, F., M'Boly, E., Kanda, M., Tshimbe, M. & Morgan, M. (2000) *AIDS Patient Care STDS* **14**, 297-304
9. Woods, R., Maartens, G. & Lombard, C. J. (2000) *J. Acquir. Immune Defic. Syndr.* **23**, 75-80.
10. Styblo, K. (1991 ) *The Epidemiology of Tuberculosis* [Royal Netherlands Tuberculosis Association (KNCV), The Hague, The Netherlands].
11. Churchyard, G. J., Kleinschmidt, T., Corbett, L. L., Mulder, D. & DeCock, K. L. (1999) *Int. J. Tuberc. Lung Dis.* **3**, 791-798.
