# Supplementary material
Source: PubMed Central journal article supplement (PMC122226)
Supplement: pnas_022618299_3.pdf [file pnas_022618299_3.pdf]

Supporting information for Murray (January 29, 2002) *Proc. Natl. Acad. Sci. USA*, 10.1073/pnas.022618299.

**Table 4. Model-based output statistics for nine settings from a microsimulation of tuberculosis transmission**

| Output statistics             | High burden |         |           |          | Moderate burden |         |             | Low burden |             |
|-------------------------------|-------------|---------|-----------|----------|-----------------|---------|-------------|------------|-------------|
|                               | No HIV      | Mod HIV | Mod HIV   | High HIV | No HIV          | Low HIV | Mod HIV     | Mod HIV    | Low HIV     |
|                               | Afghan      | Sudan   | NY prison | Malawi   | Cuba            | Algeria | U.S. prison | U.S.       | Netherlands |
| Tuberculosis incidence*       | 341         | 190     | 581       | 484      | 23              | 32      | 82          | 9          | 14          |
| Consensus incidence estimates | 333         | 200     | NA**      | 401      | 18              | 44      | NA**        | 7          | 10          |
| ARI***                        | 0.043       | 0.025   | 0.046     | 0.036    | 0.002           | 0.003   | 0.005       | 0.0004     | 0.001       |
| Maximum cluster size          | 68          | 87      | 19        | 48       | 12              | 9       | 17          | 24         | 15          |
| Mean cluster size             | 18.7        | 10.2    | 3.2       | 2.6      | 1.3             | 1.7     | 2.9         | 2.5        | 1.4         |
| Proportion unique isolates    | 0.107       | 0.217   | 0.253     | 0.350    | 0.390           | 0.432   | 0.289       | 0.440      | 0.490       |

Consensus incidence estimates are shown for comparison with estimates obtained from the model.

\*Incidence per 100,000.

\*\*No data available.

\*\*\*Annual risk of infection.
