# Supplementary material
Source: PubMed Central journal article supplement (PMC122226)
Supplement: pnas_022618299_4.pdf [file pnas_022618299_4.pdf]

Supporting information for Murray (January 29, 2002) *Proc. Natl. Acad. Sci. USA*,  
10.1073/pnas.022618299.

**Table 5. Impact of variables on the incidence of infection and disease and the distribution of cluster sizes in a microsimulation model of tuberculosis transmission in a moderate burden setting**

| Variables                                             | Inc*   | SD <sup>†</sup> | ARI <sup>‡</sup> | SD     | Prop uniq <sup>§</sup> | SD   | Max <sup>¶</sup> | Mean <sup>  </sup> | SD   |
|-------------------------------------------------------|--------|-----------------|------------------|--------|------------------------|------|------------------|--------------------|------|
| Bacillus Calmette--Guérin coverage                    |        |                 |                  |        |                        |      |                  |                    |      |
| 0                                                     | 37.84  | 12.60           | 0.0030           | 0.0017 | 0.33                   | 0.12 | 10               | 1.76               | 0.43 |
| 0.2                                                   | 32.25  | 13.72           | 0.0022           | 0.0018 | 0.43                   | 0.10 | 9                | 1.70               | 0.32 |
| 0.4                                                   | 29.98  | 19.65           | 0.0020           | 0.0018 | 0.47                   | 0.41 | 14               | 2.41               | 1.92 |
| 0.6                                                   | 30.98  | 15.80           | 0.0020           | 0.0017 | 0.36                   | 0.15 | 7                | 1.90               | 0.60 |
| 0.8                                                   | 34.98  | 14.89           | 0.0021           | 0.0011 | 0.43                   | 0.24 | 7                | 1.76               | 0.56 |
| 1                                                     | 24.30  | 9.32            | 0.0015           | 0.0014 | 0.55                   | 0.39 | 6                | 1.82               | 0.72 |
| Chemoprophylaxis                                      |        |                 |                  |        |                        |      |                  |                    |      |
| 0.2                                                   | 33.14  | 15.04           | 0.0022           | 0.0025 | 0.58                   | 0.25 | 6                | 1.45               | 0.27 |
| 0.4                                                   | 26.50  | 7.20            | 0.0018           | 0.0014 | 0.47                   | 0.10 | 7                | 1.59               | 0.42 |
| 0.6                                                   | 20.78  | 9.57            | 0.0009           | 0.0007 | 0.62                   | 0.39 | 10               | 1.68               | 0.94 |
| 0.8                                                   | 16.54  | 5.49            | 0.0007           | 0.0006 | 0.73                   | 0.29 | 3                | 1.24               | 0.31 |
| 1                                                     | 14.80  | 6.32            | 0.0006           | 0.0001 | 0.77                   | 0.26 | 2                | 1.12               | 0.28 |
| Duration of infectiousness                            |        |                 |                  |        |                        |      |                  |                    |      |
| 3m                                                    | 23.58  | 11.58           | 0.0014           | 0.0010 | 0.51                   | 0.24 | 5                | 1.20               | 0.39 |
| 6m                                                    | 27.93  | 5.30            | 0.0019           | 0.0022 | 0.40                   | 0.19 | 4                | 1.39               | 0.47 |
| 9m                                                    | 32.07  | 18.75           | 0.0021           | 0.0017 | 0.43                   | 0.20 | 9                | 1.45               | 0.30 |
| 12m                                                   | 34.76  | 9.54            | 0.0025           | 0.0015 | 0.42                   | 0.12 | 7                | 1.63               | 0.41 |
| 15m                                                   | 33.71  | 25.83           | 0.0031           | 0.0027 | 0.30                   | 0.10 | 7                | 1.59               | 0.36 |
| 18m                                                   | 37.20  | 13.47           | 0.0038           | 0.0019 | 0.28                   | 0.23 | 12               | 1.88               | 0.40 |
| Proportion of latently infected who receive treatment |        |                 |                  |        |                        |      |                  |                    |      |
| 0.2                                                   | 22.58  | 12.63           | 0.0016           | 0.0015 | 0.45                   | 0.21 | 6                | 1.60               | 0.27 |
| 0.4                                                   | 19.61  | 5.92            | 0.0013           | 0.0012 | 0.50                   | 0.10 | 7                | 1.63               | 0.42 |
| 0.6                                                   | 14.43  | 4.88            | 0.0007           | 0.0003 | 0.47                   | 0.30 | 4                | 1.58               | 0.94 |
| 0.8                                                   | 13.40  | 3.64            | 0.0005           | 0.0003 | 0.51                   | 0.21 | 2                | 1.59               | 0.31 |
| HIV prevalence                                        |        |                 |                  |        |                        |      |                  |                    |      |
| 0.0001                                                | 22.33  | 17.75           | 0.0008           | 0.0007 | 0.34                   | 0.57 | 13               | 2.00               | 0.37 |
| 0.001                                                 | 23.10  | 5.53            | 0.0040           | 0.0010 | 0.48                   | 0.41 | 6                | 1.67               | 0.79 |
| 0.01                                                  | 193.60 | 35.22           | 0.0218           | 0.0048 | 0.46                   | 0.04 | 15               | 1.73               | 0.43 |
| 0.1                                                   | 575.60 | 75.75           | 0.0495           | 0.0028 | 0.52                   | 0.04 | 24               | 1.58               | 0.26 |
| PPD prevalence                                        |        |                 |                  |        |                        |      |                  |                    |      |
| 0.166                                                 | 32.25  | 13.72           | 0.0022           | 0.0018 | 0.43                   | 0.10 | 9                | 1.77               | 0.32 |

|               |       |       |        |        |      |      |    |      |      |
|---------------|-------|-------|--------|--------|------|------|----|------|------|
| 0.259         | 39.96 | 7.06  | 0.0029 | 0.0013 | 0.44 | 0.08 | 5  | 1.70 | 0.35 |
| 0.324         | 52.78 | 36.47 | 0.0033 | 0.0026 | 0.49 | 0.23 | 14 | 1.65 | 0.57 |
| 0.373         | 58.80 | 26.12 | 0.0030 | 0.0021 | 0.58 | 0.22 | 6  | 1.56 | 0.40 |
| 0.4113        | 73.86 | 41.69 | 0.0036 | 0.0028 | 0.63 | 0.23 | 5  | 1.39 | 0.48 |
| Age structure |       |       |        |        |      |      |    |      |      |
| 1             | 37.09 | 18.43 | 0.0026 | 0.0015 | 0.35 | 0.22 | 10 | 1.97 | 0.69 |
| 2             | 32.25 | 13.72 | 0.0022 | 0.0018 | 0.43 | 0.10 | 9  | 1.70 | 0.32 |
| 3             | 26.48 | 9.15  | 0.0017 | 0.0012 | 0.48 | 0.09 | 8  | 1.69 | 0.33 |

Baseline parameters are based on estimates for Algeria and are shown in yellow.

\*Incidence as cases per 100,000.

†Standard deviation.

‡Annual risk of infection.

§Proportion of cases that are unique.

¶Maximum cluster size.

||Mean cluster size.
